# Supplementary material for: Sol–gel synthesis of Dictyophora-shaped hierarchically porous Mn2SnO4/C materials as anodes for Li-ion batteries
Source: Royal Society of Chemistry journal article supplement (doi:10.1039/d1nj00483b), 2021-01-01
Supplement: d1nj00483b1.pdf [file d1nj00483b1.pdf]

## Supporting Information

### Sol-gel synthesis of dictyophora-shaped hierarchically porous $\text{Mn}_2\text{SnO}_4/\text{C}$ materials as anode for Li-ion batteries

Jintian Wang,<sup>a</sup> Junzhang Wang,<sup>a</sup> Wei Liu,<sup>a</sup> Xingzhong Guo<sup>a,b,\*</sup> and Hui Yang<sup>a,b</sup>

<sup>a</sup> State Key Laboratory of Silicon Materials, School of Materials Science and Engineering of Zhejiang University, Hangzhou P.R. China 310027;

<sup>b</sup> Hangzhou Global Scientific and Technological Innovation Center, Zhejiang University, Hangzhou P.R. China 311200;

\*Corresponding author: Xingzhong Guo, Tel&Fax: 86-571-87953313, Email: msewj01@zju.edu.cn

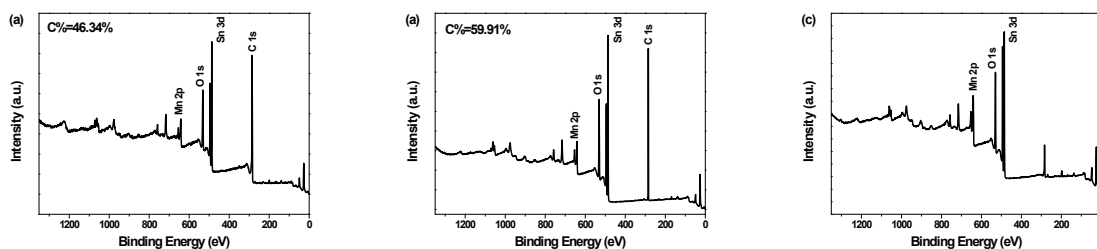

Figure S1. Wide-scan XPS spectra: (a) DS-cMSO/C, (b) BS-cMSO/C and (c) cMO/SO.

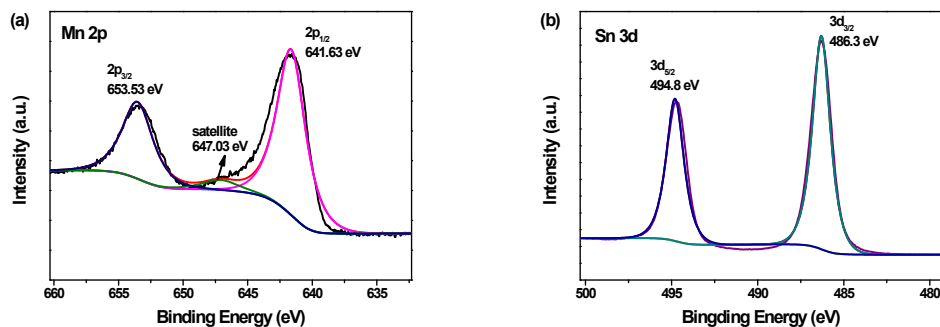

Figure S2. XPS spectra of BS-cMSO/C: (a) Mn 2p, (b) Sn 3d.

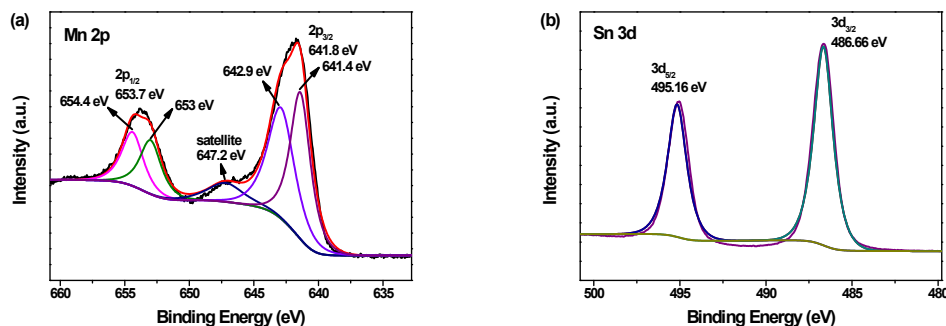

**Figure S3.** XPS spectra of cMO/SO: (a) Mn 2p, (b) Sn 3d.

In order to investigate the reaction during the calcination, the TG-DSC measurement of the Mn-Sn hydroxide xerogel under air atmosphere was carried out, as shown in Figure S4. As the sample was prepared with the polymer, the strong exothermic peak appears between 300 and 400 °C in the DSC curve and the steep reduction of the sample weight is observed around 350 °C in the TG curve, which are attributed to the pyrolysis of the polymers. The weight loss is also observed below 250 °C, which is derived from the removal of Cl-containing species from the sample. The obtained gel networks include a lot of Cl<sup>-</sup> ions derived from MnCl<sub>2</sub> and SnCl<sub>2</sub>. These species presumably coordinate to Mn(II) and Sn(II) or play a role of the charge compensation in the networks. The exothermic peak can be observed around 357 °C in the sample. Taking into account that the crystallization of the sample with the polymers took place between 300 and 550 °C, as shown in Figure 2, the exothermic peak around 357 °C can be attributed to the crystallization of Mn<sub>2</sub>SnO<sub>4</sub>.

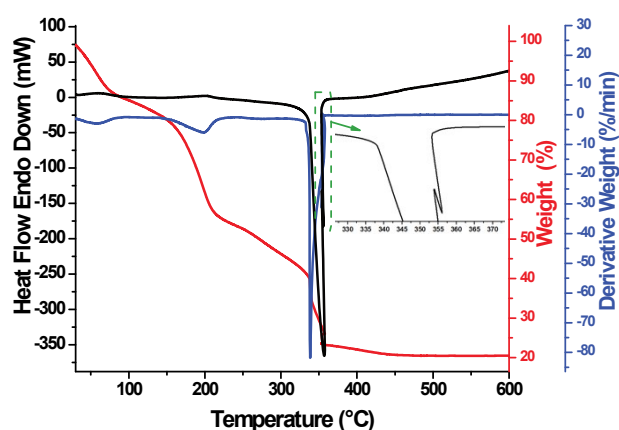

**Figure S4.** TG-DSC curves of the Mn-Sn hydroxide.

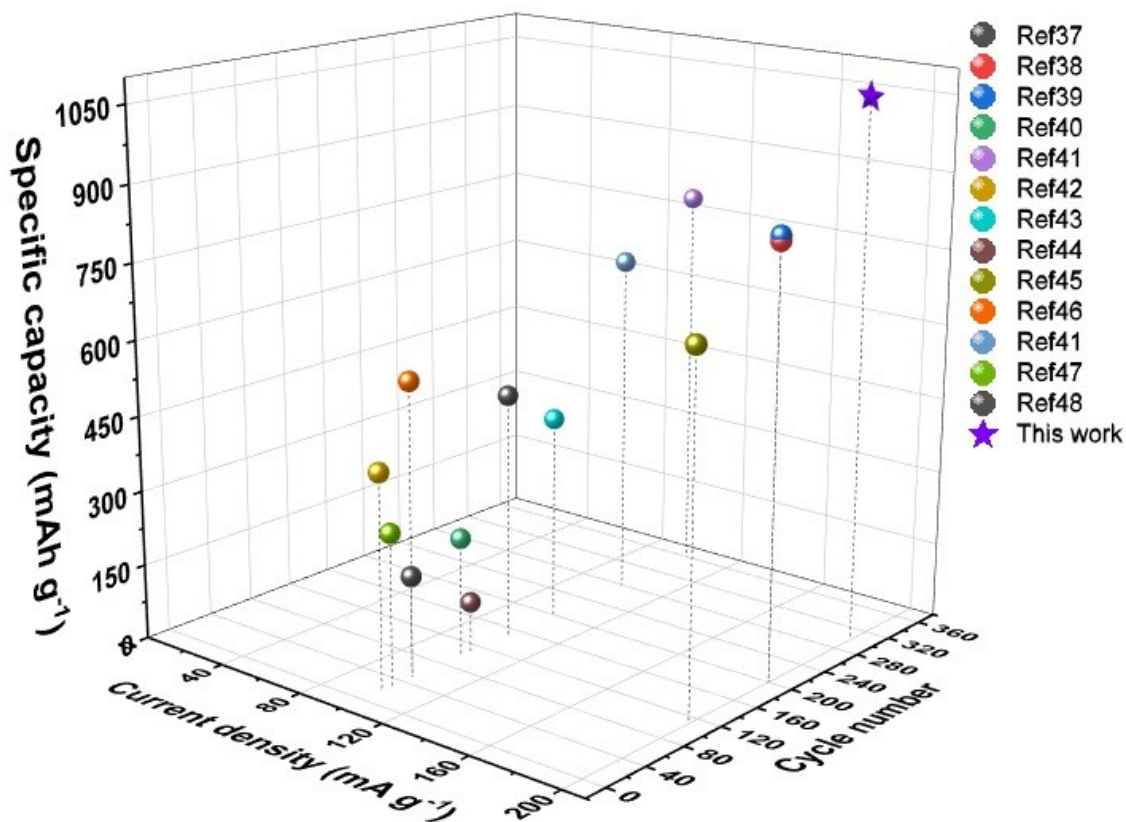

**Figure S5.** Electrochemical performances of  $Mn_2SnO_4$  materials as LIB anode reported in the open literature.

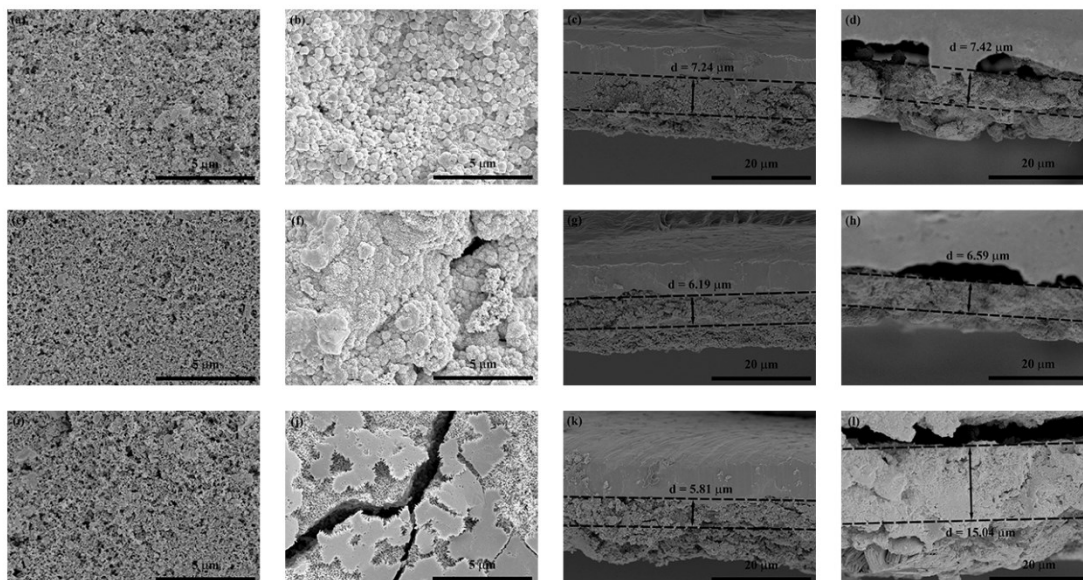

**Figure S6.** The SEM images of the (a and b) DS-cMSO/C, (e and f) BS-cMSO/C and (i and j) cMO/SO electrode surface before and after 50 cycles; The cross-sectional SEM images of the (c and d) DS-cMSO/C, (g and h) BS-cMSO/C and (k and l) cMO/SO electrode surface before and after 50 cycles.

**Table S1.** The  $R_s$ ,  $R_{ct}$  and lithium ion diffusion coefficients  $D_{(Li+)}$  of DS-cMSO/C, BS-cMSO/C and cMO/SO.

| Electrodes | $R_s$ ( $\Omega$ ) | $R_{ct}$ ( $\Omega$ ) | Slope ( $Z' \sim \omega^{-1/2}$ ) | $D_{(Li+)}$ ( $cm^2/S$ ) |
|------------|--------------------|-----------------------|-----------------------------------|--------------------------|
| DS-cMSO/C  | 4.47               | 74.66                 | 297.63                            | $1.47 \times 10^{-18}$   |
| BS-cMSO/C  | 3.93               | 218.50                | 300.28                            | $1.45 \times 10^{-18}$   |
| cMO/SO     | 5.94               | 288.90                | 383.05                            | $5.94 \times 10^{-19}$   |
